# Supplementary material
Source: PubMed Central journal article supplement (PMC8425402)

**Phenyl-lactic acid is an active ingredient  
in bactericidal supernatants of *Lactobacillus crispatus***

Omar Abdul-Rahim, Qihao Wu, Travis K. Price, Giuseppe Pistone, Katherine Diebel,

Tim S. Bugni, Alan J. Wolfe

**Supplemental Information**

**Supplemental Figure 1. Concentrations of known inhibitory molecules in LC40 CFS.** Hydrogen peroxide concentrations were determined by  $\text{KMNO}_4$  titration. Organic acid concentrations were determined by UV-Vis spectrophotometry.  $\text{H}_2\text{O}_2$  and organic acid concentrations in CFS were lower than concentrations determined to exhibit inhibitory activity against common uropathogens.

| CFS Molecule      | Inhibitory Concentration | Average Lactobacilli Concentration | LC40 Produced Concentration |
|-------------------|--------------------------|------------------------------------|-----------------------------|
| Hydrogen Peroxide | 2.5mM                    | 0.03 - 2.6mM                       | 11.51uM                     |
| Lactic Acid       | 70mM                     | 62mM                               | 9.52mM                      |
| Acetic Acid       | 8.33mM                   | 13.8mM                             | 7.26mM                      |

**Supplemental Figure 2. The killing activity of *L. crispatus* CFS can be restored upon reversion to low pH.** CFS samples of *L. crispatus* isolate LC9873 (starting pH 3.9) were modified to pH 3.7 or pH 7.0, incubated on benchtop for 1 hour, and then modified further (3.7 modified to 7.0, 7.0 modified to 3.7) before being tested for killing activity against *E. coli* strain EC9875.

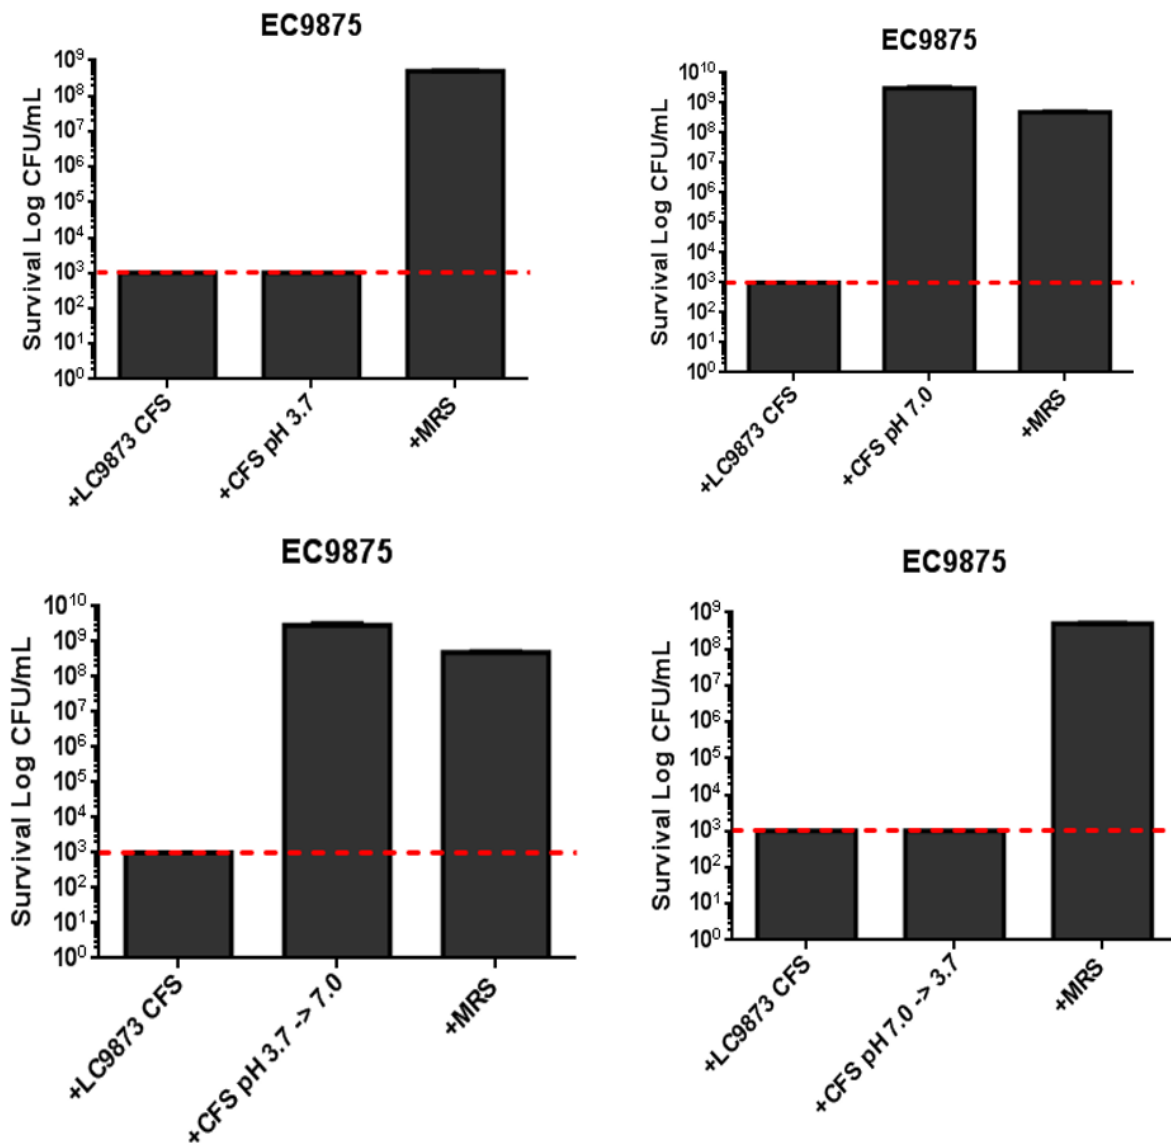

**Supplemental Figure 3. Dilution of CFS abrogates killing activity.** CFS samples from *L. crispatus* isolate LC40 were serially diluted in either pH 3.7 1X PBS (left) or pH 3.7 1X H<sub>2</sub>O (right) before being tested for killing activity against *E. coli* UPEC strain CFT073.

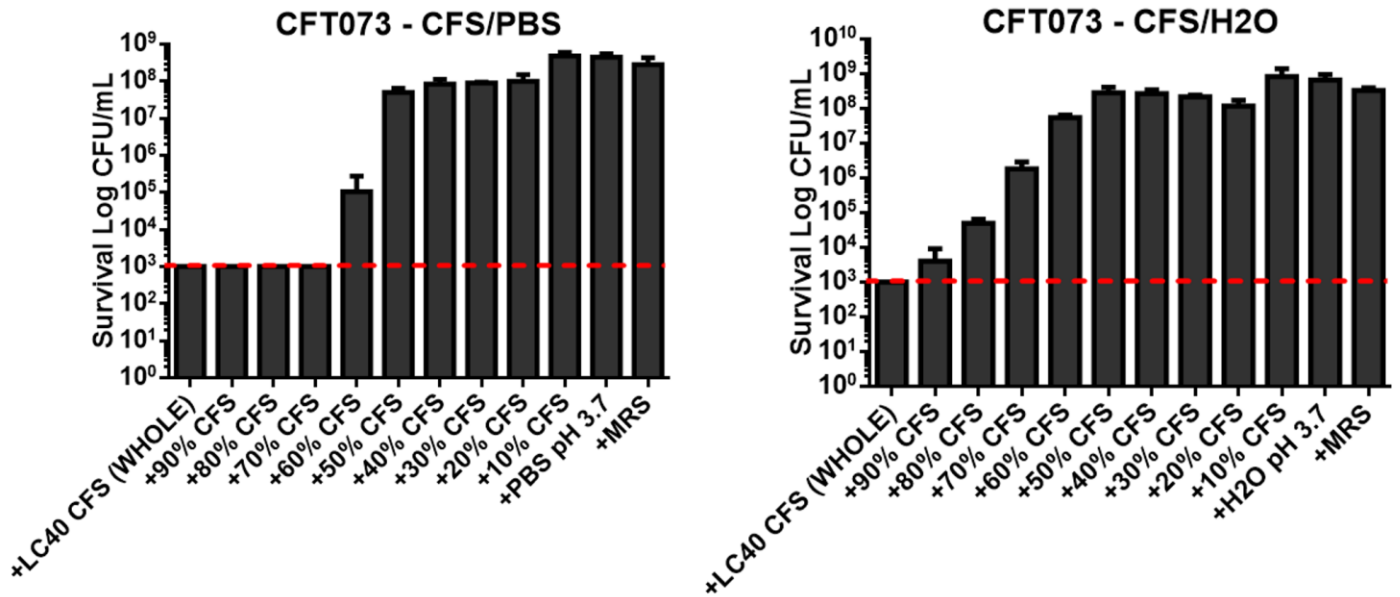

**Supplemental Figure 4 PLA and Methyl-PLA Chemical Structures** The chemical structures of both PLA (left) and methyl-PLA (right). Compared to methyl-PLA, PLA exhibited increased pH sensitivity.

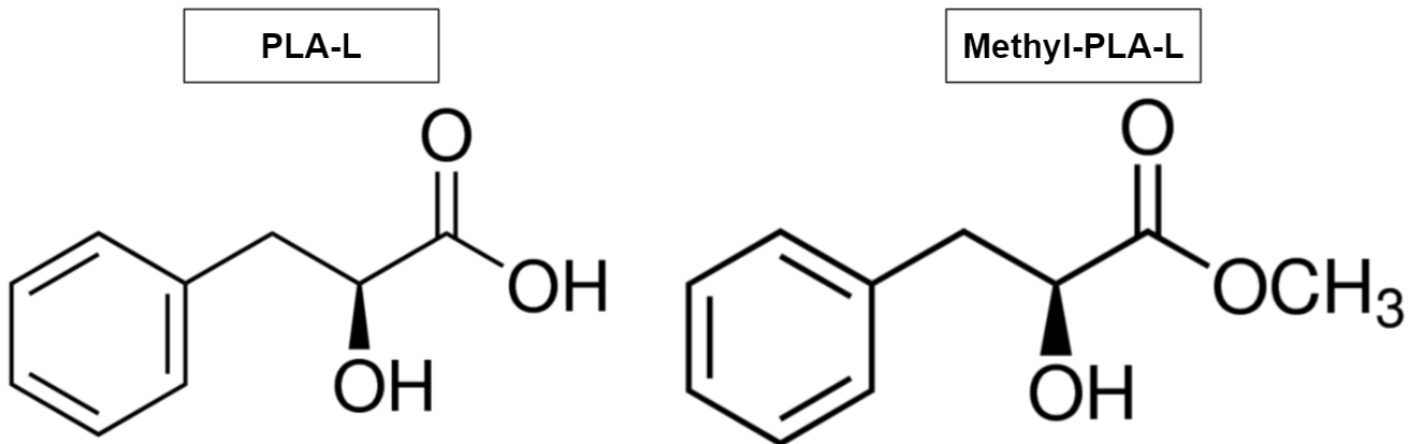

Supplement: jb.00360-21-s0001.pdf [file jb.00360-21-s0001.pdf]
